# Supplementary material
Source: publisher site journal article supplement (https://www.spandidos-publications.com/7722/downloadSupplementary)
Supplement: Supplementary file 1 [file downloadSupplementary]

Table SI. Patient characteristics (n=45).

| Variable                  | Value      |
|---------------------------|------------|
| Median age, years (range) | 67 (35-84) |
| Sex, n (%)                |            |
| Male                      | 29 (64)    |
| Female                    | 16 (36)    |
| ECOG PS, n (%)            |            |
| 0                         | 34 (76)    |
| 1                         | 6 (13)     |
| 2                         | 1 (2)      |
| 3                         | 4 (9)      |
| Primary site, n (%)       |            |
| Tongue                    | 24 (53)    |
| Buccal mucosa             | 4 (9)      |
| Oral floor                | 4 (9)      |
| Upper gingiva             | 6 (13)     |
| Lower gingiva             | 5 (11)     |
| Upper lip                 | 1 (2)      |
| Mandible                  | 1 (2)      |
| Stage, n (%)              |            |
| I                         | 4 (9)      |
| II                        | 13 (29)    |
| III                       | 4 (9)      |

|                                        |         |
|----------------------------------------|---------|
| IV                                     | 24 (53) |
| ICI, n (%)                             |         |
| Nivolumab                              | 23 (51) |
| Pembrolizumab                          | 22 (49) |
| Administration line, n (%)             |         |
| 1st                                    | 25 (56) |
| 2nd                                    | 19 (42) |
| 3rd                                    | 1 (2)   |
| Initial treatment: Operation, n (%)    |         |
| Yes                                    | 42 (93) |
| No                                     | 3 (7)   |
| Initial treatment: Radiotherapy, n (%) |         |
| Yes                                    | 39 (87) |
| No                                     | 6 (13)  |
| Target lesion, n (%)                   |         |
| Local                                  | 12 (27) |
| Regional LN                            | 5 (11)  |
| Distal metastasis                      | 21 (47) |
| Local, regional LN                     | 1 (2)   |
| Local, distant metastasis              | 3 (7)   |
| Regional LN, distant metastasis        | 2 (4)   |
| Local, regional LN, distant metastasis | 1 (2)   |
| CPS, n (%)                             |         |

|                                 |         |
|---------------------------------|---------|
| <1%                             | 4 (9)   |
| 1-20%                           | 4 (9)   |
| ≥20%                            | 29 (64) |
| Administration method, n (%)    |         |
| Monotherapy                     | 33 (73) |
| Chemotherapy combination        | 8 (18)  |
| Chemotherapy combination → Mono | 4 (9)   |

ECOG PS, Eastern Cooperative Oncology Group Performance Status; ICI, immune checkpoint inhibitor; LN, lymph node; CPS, Combined Positive Score.

Table SII. Response to nivolumab and immune-related adverse events. Clinical outcomes of patients treated with ICI (n=45).

| Variable                                             | Value    | %  |
|------------------------------------------------------|----------|----|
| Median number of administration (range)              | 5 (1-68) |    |
| Response                                             |          |    |
| CR                                                   | 4        | 9  |
| PR                                                   | 6        | 13 |
| SD                                                   | 5        | 11 |
| PD                                                   | 30       | 67 |
| ORR (CR + PR)                                        | 10       | 22 |
| DCR (CR + PR + SD)                                   | 15       | 33 |
| irAE                                                 |          |    |
| No                                                   | 32       | 71 |
| Yes                                                  | 13       | 29 |
| Thyroid dysfunction (hyperthyroidism/hypothyroidism) | 1/3      | 9  |
| Interstitial pneumonia (Grade 1/Grade 3)             | 2/1      | 7  |
| Colitis (Grade 2/Grade 3)                            | 1/1      | 4  |
| Dermatologic disorders                               | 1        | 2  |
| Interstitial nephritis (Grade 3)                     | 1        | 2  |
| Hypopituitarism                                      | 1        | 2  |

|                             |   |   |
|-----------------------------|---|---|
| Liver dysfunction (Grade 3) | 1 | 2 |
| Atrial fibrillation         | 1 | 2 |
| Acute kidney failure        | 1 | 2 |

CR, complete response; PR, partial response; SD, stable disease; PD, progressive disease;  
ORR, overall response rate; DCR, disease control rate; irAE, immune-related adverse  
events.

Table SIII. AUC data.

| AUC         | Pre     | Post    |
|-------------|---------|---------|
| NLR         | 0.53802 | 0.76959 |
| LMR         | 0.47350 | 0.68779 |
| PNI         | 0.59217 | 0.69585 |
| PLR         | 0.50691 | 0.64747 |
| CAR         | 0.39516 | 0.73618 |
| Eosinophil  | 0.55876 | 0.51382 |
| Lymphocytes | 0.58641 | 0.69935 |

AUC, area under the curve; NLR, neutrophil-to-lymphocyte ratio; LMR, lymphocyte-to-monocyte ratio; PNI, prognostic nutritional index; PLR, platelet-to-lymphocyte ratio; CAR, C-reactive protein-to-albumin ratio.

Table SIV. Univariate and multivariate analysis of prognosis factors for PFS.

| Variable        | Number | Univariate |            |                     | Multivariate |            |                     |
|-----------------|--------|------------|------------|---------------------|--------------|------------|---------------------|
|                 |        | HR         | 95% CI     | P-value             | HR           | 95% CI     | P-value             |
| Age, years      |        |            |            |                     |              |            |                     |
| <65             | 20     | Ref.       |            |                     |              |            |                     |
| ≥65             | 25     | 1.34       | 0.67-2.69  | 0.406               |              |            |                     |
| Sex             |        |            |            |                     |              |            |                     |
| Male            | 29     | 1.26       | 0.61-2.62  | 0.523               | 3.86         | 1.32-11.31 | 0.0138 <sup>a</sup> |
| Female          | 16     | Ref.       |            |                     |              |            |                     |
| ECOG PS         |        |            |            |                     |              |            |                     |
| 0               | 34     | Ref.       |            |                     |              |            |                     |
| ≥1              | 11     | 4.64       | 2.01-10.72 | 0.0003 <sup>a</sup> |              |            |                     |
| ICI             |        |            |            |                     |              |            |                     |
| Nivolumab       | 23     | 1.90       | 0.95-3.80  | 0.069               | 11.75        | 2.68-51.49 | 0.0011 <sup>a</sup> |
| Pembrolizumab   | 22     | Ref.       |            |                     |              |            |                     |
| irAE            |        |            |            |                     |              |            |                     |
| Positive        | 13     | Ref.       |            |                     |              |            |                     |
| Negative        | 32     | 1.40       | 0.65-3.03  | 0.378               |              |            |                     |
| ICI combination |        |            |            |                     |              |            |                     |
| Monotherapy     | 33     | Ref.       |            |                     |              |            |                     |
| With            | 12     | 2.13       | 0.82-5.52  | 0.092               |              |            |                     |

|                        |    |      |            |                     |      |            |                     |
|------------------------|----|------|------------|---------------------|------|------------|---------------------|
| chemotherapy           |    |      |            |                     |      |            |                     |
| Radiation              |    |      |            |                     |      |            |                     |
| Previously             | 39 | Ref. |            |                     |      |            |                     |
| No                     | 6  | 2.57 | 1.03-6.44  | 0.043 <sup>a</sup>  |      |            |                     |
| BMI, kg/m <sup>2</sup> |    |      |            |                     |      |            |                     |
| <18.37                 | 20 | 1.57 | 0.79-3.14  | 0.199               |      |            |                     |
| ≥18.37                 | 25 | Ref. |            |                     |      |            |                     |
| CPS                    |    |      |            |                     |      |            |                     |
| <20                    | 8  | 1.41 | 0.55-3.59  | 0.488               |      |            |                     |
| ≥20                    | 29 | Ref. |            |                     |      |            |                     |
| DCR                    |    |      |            |                     |      |            |                     |
| CR/PR/SD               | 15 | Ref. |            |                     |      |            |                     |
| PD                     | 40 | 5.54 | 2.15-14.27 | 0.0004 <sup>a</sup> | 9.15 | 2.38-35.14 | 0.0013 <sup>a</sup> |
| Primary site           |    |      |            |                     |      |            |                     |
| Tongue                 | 24 | Ref. |            |                     |      |            |                     |
| Otherwise              | 21 | 1.75 | 0.88-3.50  | 0.114               | 4.87 | 1.51-15.72 | 0.0081 <sup>a</sup> |

<sup>a</sup>Indicates a significant difference among groups with P<0.05. PFS, progression-free survival; ECOG PS, Eastern Cooperative Oncology Group Performance Status; ICI, immune checkpoint inhibitor; irAE, immune-related adverse events; BMI, body mass index; CPS, Combined Positive Score; DCR, disease control rate; HR, hazard ratio; CI, confidence interval; Ref, Reference.

Table SV. Univariate and multivariate analysis of pre- and post-treatment factors for PFS.

| A, Pre-treatment factors |        |            |            |                     |              |            |                     |
|--------------------------|--------|------------|------------|---------------------|--------------|------------|---------------------|
| Variable                 | Number | Univariate |            |                     | Multivariate |            |                     |
|                          |        | HR         | 95% CI     | P-value             | HR           | 95% CI     | P-value             |
| Age, years               |        |            |            |                     |              |            |                     |
| <65                      | 20     | Ref.       |            |                     |              |            |                     |
| ≥65                      | 25     | 1.34       | 0.67-2.69  | 0.406               |              |            |                     |
| Sex                      |        |            |            |                     |              |            |                     |
| Male                     | 29     | 1.26       | 0.61-2.62  | 0.523               | 4.74         | 1.59-14.15 | 0.0052 <sup>a</sup> |
| Female                   | 16     | Ref.       |            |                     |              |            |                     |
| ECOG PS                  |        |            |            |                     |              |            |                     |
| 0                        | 34     | Ref.       |            |                     |              |            |                     |
| ≥1                       | 11     | 4.64       | 2.01-10.72 | 0.0003 <sup>a</sup> |              |            |                     |
| CPS                      |        |            |            |                     |              |            |                     |
| <20                      | 8      | 1.41       | 0.55-3.59  | 0.488               |              |            |                     |
| ≥20                      | 29     | Ref.       |            |                     |              |            |                     |
| ICI combination          |        |            |            |                     |              |            |                     |
| Mono                     | 33     | Ref.       |            |                     |              |            |                     |
| With chemotherapy        | 12     | 2.13       | 0.82-5.52  | 0.092               |              |            |                     |
| Radiation                |        |            |            |                     |              |            |                     |
| Previously               | 39     | Ref.       |            |                     |              |            |                     |

|                            |    |      |           |                    |  |  |  |
|----------------------------|----|------|-----------|--------------------|--|--|--|
| No                         | 6  | 2.57 | 1.03-6.44 | 0.043 <sup>a</sup> |  |  |  |
| BMI, kg/<br>m <sup>2</sup> |    |      |           |                    |  |  |  |
| <18.37                     | 20 | 1.57 | 0.79-3.14 | 0.199              |  |  |  |
| ≥18.37                     | 25 | Ref. |           |                    |  |  |  |
| Pre-NLR                    |    |      |           |                    |  |  |  |
| <4.7                       | 16 | Ref. |           |                    |  |  |  |
| ≥4.7                       | 29 | 1.16 | 0.63-2.15 | 0.632              |  |  |  |
| Pre-LMR                    |    |      |           |                    |  |  |  |
| <1.29                      | 32 | Ref. |           |                    |  |  |  |
| ≥1.29                      | 13 | 1.62 | 0.82-3.20 | 0.152              |  |  |  |
| Pre-PNI                    |    |      |           |                    |  |  |  |
| <43.75                     | 30 | 1.12 | 0.59-2.12 | 0.726              |  |  |  |
| ≥43.75                     | 15 | Ref. |           |                    |  |  |  |
| Pre-PLR                    |    |      |           |                    |  |  |  |
| <453.5                     | 31 | 1.86 | 0.96-3.61 | 0.057              |  |  |  |
| ≥453.5                     | 14 | Ref. |           |                    |  |  |  |
| Pre-CAR                    |    |      |           |                    |  |  |  |
| <6.35                      | 43 | Ref. |           |                    |  |  |  |
| ≥6.35                      | 2  | 2.10 | 0.50-8.88 | 0.362              |  |  |  |
| Pre-<br>eosinophils        |    |      |           |                    |  |  |  |
| <120                       | 18 | 1.06 | 0.56-2.00 | 0.861              |  |  |  |

|                           |        |            |           |                     |              |            |                     |
|---------------------------|--------|------------|-----------|---------------------|--------------|------------|---------------------|
| ≥120                      | 27     | Ref.       |           |                     |              |            |                     |
| Pre-lymphocytes           |        |            |           |                     |              |            |                     |
| <670                      | 29     | Ref.       |           |                     |              |            |                     |
| ≥670                      | 16     | 1.14       | 0.54-2.40 | 0.733               |              |            |                     |
|                           |        |            |           |                     |              |            |                     |
| B, Post-treatment factors |        |            |           |                     |              |            |                     |
|                           |        | Univariate |           |                     | Multivariate |            |                     |
| Variable                  | Number | HR         | 95% CI    | P-value             | HR           | 95% CI     | P-value             |
| irAE                      |        |            |           |                     |              |            |                     |
| Positive                  | 13     | Ref.       |           |                     |              |            |                     |
| Negative                  | 32     | 1.40       | 0.65-3.03 | 0.378               |              |            |                     |
| Post-NLR                  |        |            |           |                     |              |            |                     |
| <7.17                     | 22     | Ref.       |           |                     |              |            |                     |
| ≥7.17                     | 23     | 2.21       | 1.14-4.29 | 0.014 <sup>a</sup>  | 3.80         | 1.11-13.02 | 0.0339 <sup>a</sup> |
| Post-LMR                  |        |            |           |                     |              |            |                     |
| <1.23                     | 15     | 1.11       | 0.53-2.35 | 0.781               |              |            |                     |
| ≥1.23                     | 30     | Ref.       |           |                     | 4.02         | 1.14-14.18 | 0.0304 <sup>a</sup> |
| Post-PNI                  |        |            |           |                     |              |            |                     |
| <36.6                     | 16     | 3.25       | 1.61-6.55 | 0.0015 <sup>a</sup> | 2.96         | 1.08-8.06  | 0.0342 <sup>a</sup> |
| ≥36.6                     | 29     | Ref.       |           |                     |              |            |                     |
| Post-PLR                  |        |            |           |                     |              |            |                     |
| <221.1                    | 13     | Ref.       |           |                     |              |            |                     |

|                  |    |      |           |                     |  |  |  |
|------------------|----|------|-----------|---------------------|--|--|--|
| ≥221.1           | 32 | 1.43 | 0.66-3.10 | 0.352               |  |  |  |
| Post-CAR         |    |      |           |                     |  |  |  |
| <0.44            | 22 | Ref. |           |                     |  |  |  |
| ≥0.44            | 23 | 2.93 | 1.44-5.96 | 0.0029 <sup>a</sup> |  |  |  |
| Post-eosinophil  |    |      |           |                     |  |  |  |
| <260             | 32 | 1.33 | 0.61-2.88 | 0.463               |  |  |  |
| ≥260             | 13 | Ref. |           |                     |  |  |  |
| Post-lymphocytes |    |      |           |                     |  |  |  |
| <770             | 21 | Ref. |           |                     |  |  |  |
| ≥770             | 25 | 1.05 | 0.52-2.11 | 0.902               |  |  |  |
| Post-mGPS        |    |      |           |                     |  |  |  |
| 0                | 13 | Ref. |           |                     |  |  |  |
| 1                | 33 | 2.01 | 0.90-4.50 | 0.088               |  |  |  |

<sup>a</sup>Indicates a significant difference among groups with P<0.05. PFS, progression-free survival; ECOG PS, Eastern Cooperative Oncology Group Performance Status; CPS, Combined Positive Score; ICI, immune checkpoint inhibitor; BMI, body mass index; NLR, neutrophil-to-lymphocyte ratio; LMR, lymphocyte-to-monocyte ratio; PNI, prognostic nutritional index; PLR, platelet-to-lymphocyte ratio; CAR, C-reactive protein-to-albumin ratio; HR, hazard ratio; CI, confidence interval; Ref, reference.

Table SVI. Univariate analysis of prognostic factors for the DCR.

| Variable               | Response | Value (%) | P-value             |
|------------------------|----------|-----------|---------------------|
| Age, years             |          |           | 0.071               |
| <65                    | CR/PR/SD | 9 (20)    |                     |
|                        | PD       | 11 (24)   |                     |
| ≥65                    | CR/PR/SD | 5 (11)    |                     |
|                        | PD       | 20 (44)   |                     |
| Sex                    |          |           | 0.988               |
| Male                   | CR/PR/SD | 9 (20)    |                     |
|                        | PD       | 20 (44)   |                     |
| Female                 | CR/PR/SD | 5 (11)    |                     |
|                        | PD       | 11 (24)   |                     |
| ECOG PS                |          |           | 0.0018 <sup>a</sup> |
| 0                      | CR/PR/SD | 14 (31)   |                     |
|                        | PD       | 20 (45)   |                     |
| ≥1                     | CR/PR/SD | 0 (0)     |                     |
|                        | PD       | 11 (24)   |                     |
| CPS                    |          |           | 0.007 <sup>a</sup>  |
| <20                    | CR/PR/SD | 1 (2)     |                     |
|                        | PD       | 7 (16)    |                     |
| ≥20                    | CR/PR/SD | 13 (29)   |                     |
|                        | PD       | 16 (36)   |                     |
| BMI, kg/m <sup>2</sup> |          |           | 0.032 <sup>a</sup>  |

|              |          |         |                    |
|--------------|----------|---------|--------------------|
| <18.37       | CR/PR/SD | 3 (7)   |                    |
|              | PD       | 17 (38) |                    |
| ≥18.37       | CR/PR/SD | 11 (24) |                    |
|              | PD       | 14 (31) |                    |
| Primary site |          |         | 0.319              |
| Tongue       | CR/PR/SD | 9 (20)  |                    |
|              | PD       | 15 (33) |                    |
| Otherwise    | CR/PR/SD | 5 (11)  |                    |
|              | PD       | 16 (36) |                    |
| irAE         |          |         | 0.502              |
| Positive     | CR/PR/SD | 5 (11)  |                    |
|              | PD       | 8 (18)  |                    |
| Negative     | CR/PR/SD | 9 (20)  |                    |
|              | PD       | 23 (51) |                    |
| ICI          |          |         | 0.364              |
| Mono         | CR/PR/SD | 9 (20)  |                    |
|              | PD       | 24 (53) |                    |
| Combination  | CR/PR/SD | 5 (11)  |                    |
|              | PD       | 7 (16)  |                    |
| Radiation    |          |         | 0.027 <sup>a</sup> |
| Previously   | CR/PR/SD | 14 (31) |                    |
|              | PD       | 25 (56) |                    |
| No           | CR/PR/SD | 0 (0)   |                    |

|                              |          |         |       |
|------------------------------|----------|---------|-------|
|                              | PD       | 6 (13)  |       |
| Number of ICI administration |          |         | 0.078 |
| <3                           | CR/PR/SD | 1 (2)   |       |
|                              | PD       | 9 (20)  |       |
| ≥3                           | CR/PR/SD | 13 (29) |       |
|                              | PD       | 22 (49) |       |
| Recurrent/metastasis status  |          |         | 0.730 |
| Locoregional                 | CR/PR/SD | 8 (18)  |       |
|                              | PD       | 16 (36) |       |
| Distant                      | CR/PR/SD | 6 (13)  |       |
|                              | PD       | 16 (33) |       |
| Pre-NLR                      |          |         | 0.178 |
| <4.7                         | CR/PR/SD | 7 (16)  |       |
|                              | PD       | 9 (20)  |       |
| ≥4.7                         | CR/PR/SD | 7 (16)  |       |
|                              | PD       | 22 (49) |       |
| Pre-LMR                      |          |         | 0.172 |
| <1.29                        | CR/PR/SD | 6 (13)  |       |
|                              | PD       | 7 (16)  |       |
| ≥1.29                        | CR/PR/SD | 8 (18)  |       |
|                              | PD       | 24 (53) |       |

|                 |          |         |       |
|-----------------|----------|---------|-------|
| Pre-PNI         |          |         | 0.259 |
| <43.75          | CR/PR/SD | 8 (18)  |       |
|                 | PD       | 23 (51) |       |
| ≥43.75          | CR/PR/SD | 6 (13)  |       |
|                 | PD       | 8 (18)  |       |
| Pre-PLR         |          |         | 0.259 |
| <453.5          | CR/PR/SD | 8 (18)  |       |
|                 | PD       | 23 (51) |       |
| ≥453.5          | CR/PR/SD | 6 (13)  |       |
|                 | PD       | 8 (18)  |       |
| Pre-CAR         |          |         | 0.570 |
| <6.35           | CR/PR/SD | 13 (29) |       |
|                 | PD       | 30 (67) |       |
| ≥6.35           | CR/PR/SD | 1 (2)   |       |
|                 | PD       | 1 (2)   |       |
| Pre-eosinophils |          |         | 0.117 |
| <120            | CR/PR/SD | 8 (18)  |       |
|                 | PD       | 10 (22) |       |
| ≥120            | CR/PR/SD | 6 (13)  |       |
|                 | PD       | 21 (47) |       |
| Pre-lymphocytes |          |         | 0.244 |
| <670            | CR/PR/SD | 3 (7)   |       |
|                 | PD       | 12 (27) |       |

|          |          |         |                     |
|----------|----------|---------|---------------------|
| ≥670     | CR/PR/SD | 11 (24) |                     |
|          | PD       | 19 (42) |                     |
| Post-NLR |          |         | 0.0006 <sup>a</sup> |
| <7.17    | CR/PR/SD | 12 (27) |                     |
|          | PD       | 10 (22) |                     |
| ≥7.17    | CR/PR/SD | 2 (4)   |                     |
|          | PD       | 21 (47) |                     |
| Post-LMR |          |         | 0.0065 <sup>a</sup> |
| <1.23    | CR/PR/SD | 1 (2)   |                     |
|          | PD       | 14 (31) |                     |
| ≥1.23    | CR/PR/SD | 13 (29) |                     |
|          | PD       | 17 (38) |                     |
| Post-PNI |          |         | 0.0358 <sup>a</sup> |
| <36.6    | CR/PR/SD | 2 (4)   |                     |
|          | PD       | 14 (31) |                     |
| ≥36.6    | CR/PR/SD | 12 (27) |                     |
|          | PD       | 17 (38) |                     |
| Post-PLR |          |         | 0.0396 <sup>a</sup> |
| <221.1   | CR/PR/SD | 7 (16)  |                     |
|          | PD       | 6 (13)  |                     |
| ≥221.1   | CR/PR/SD | 7 (16)  |                     |
|          | PD       | 25 (56) |                     |
| Post-CAR |          |         | 0.0062 <sup>a</sup> |

|                  |          |         |                     |
|------------------|----------|---------|---------------------|
| <0.44            | CR/PR/SD | 11 (24) |                     |
|                  | PD       | 11 (24) |                     |
| ≥0.44            | CR/PR/SD | 3 (7)   |                     |
|                  | PD       | 20 (44) |                     |
| Post-eosinophils |          |         | 0.502               |
| <260             | CR/PR/SD | 9 (20)  |                     |
|                  | PD       | 23 (51) |                     |
| ≥260             | CR/PR/SD | 5 (11)  |                     |
|                  | PD       | 8 (18)  |                     |
| Post-lymphocytes |          |         | 0.0321 <sup>a</sup> |
| <770             | CR/PR/SD | 3       |                     |
|                  | PD       | 17      |                     |
| ≥770             | CR/PR/SD | 11 (24) |                     |
|                  | PD       | 14 (31) |                     |

<sup>a</sup> Indicates a significant difference among groups with  $P < 0.05$ . DCR, disease control rate; ECOG PS, Eastern Cooperative Oncology Group Performance Status; CPS, Combined Positive Score; BMI, body mass index; irAE, immune-related adverse events; ICI, immune checkpoint inhibitor; NLR, neutrophil-to-lymphocyte ratio; LMR, lymphocyte-to-monocyte ratio; PNI, prognostic nutritional index; PLR, platelet-to-lymphocyte ratio; CAR, C-reactive protein-to-albumin ratio; CR, complete response; PR, partial response; SD, stable disease; PD, progressive disease.
